# Supplementary material for: Influence of Diet on the Bioavailability of Active Components from Zingiber officinale Using an In Vitro Digestion Model
Source: MDPI journal article supplement (doi:10.3390/foods12213897), 2023-10-24
Supplement: s1 [file s1]

# SUPPLEMENTARY FILE

**Table S1.** Composition of particular diets used in the study [61].

|           | High-fiber diet                                                       |        | Basic diet                                                                                       |        | Standard diet            |        |
|-----------|-----------------------------------------------------------------------|--------|--------------------------------------------------------------------------------------------------|--------|--------------------------|--------|
| Breakfast | milk                                                                  | 400 mL | cereal coffee + milk                                                                             | 250 mL |                          |        |
|           | oat flakes or others                                                  | 50 g   | light bread                                                                                      | 80 g   | hot chocolate            | 250 mL |
|           | wholemeal bread                                                       | 80 g   | butter                                                                                           | 10 g   | mixed bread              | 80 g   |
|           | cottage cheese                                                        | 100 g  | cottage cheese                                                                                   | 100 g  | ham sausages             | 150 g  |
|           | jam / 25 g                                                            | 25 g   | (+ 10 g chives and 25 g cucumber)                                                                |        | mustard                  | 10 g   |
| Lunch     | tea                                                                   | 250 mL |                                                                                                  |        |                          |        |
|           | mixed bread                                                           | 80 g   | tea                                                                                              | 250 mL |                          |        |
|           | rennet cheese                                                         | 50 g   | mixed bread                                                                                      | 60 g   | coffee with milk         | 120 mL |
|           | ham                                                                   | 40 g   | chicken pate                                                                                     | 120 g  | crispbread               | 20 g   |
|           | tomato                                                                | 150 g  | apple                                                                                            | 150 g  | gouda cheese             | 50 g   |
| Dinner    | banana                                                                | 120 g  |                                                                                                  |        |                          |        |
|           | strawberry compote                                                    | 200 mL | strawberry compote                                                                               | 250 mL | compote                  | 220 mL |
|           | red borscht (30g beetroot + 25 g vegetables: carrot, parsley, celery) | 400 mL | with fruit pieces (30 g) vegetable soup (100 g vegetables: carrot, celery, parsley, cauliflower) |        | coffee with milk         | 120 mL |
|           | potatoes                                                              | 300 g  |                                                                                                  |        | tomato soup with noodles | 400 mL |
|           | pork chop                                                             | 150 g  |                                                                                                  |        | potatoes                 | 300 g  |
|           | cooked vegetables (carrot + peas (1:1) with butter)                   | 300 g  | potatoes                                                                                         | 400 mL | grilled cod              | 200 g  |
|           | apple                                                                 | 150 g  | chicken cutlet                                                                                   | 300 g  | sauerkraut salad         | 120 g  |
|           |                                                                       |        | red cabbage salad                                                                                | 150 g  | milk chocolate with nuts | 25 g   |
|           |                                                                       |        |                                                                                                  | 120 g  |                          |        |
|           |                                                                       |        |                                                                                                  |        |                          |        |
| Supper    | hot chocolate                                                         | 220 mL | tea with milk                                                                                    | 250 mL |                          |        |
|           | mixed bread                                                           | 80 g   | meatballs in sauce                                                                               | 100 g  | tea                      | 250 mL |
|           | butter                                                                | 10 g   | noodles                                                                                          | 120 g  | mixed bread              | 60 g   |
|           | chicken ham                                                           | 80 g   | salad (carrot, apple, mayonnaise)                                                                | 100 g  | sausages                 | 80 g   |
|           | pepper                                                                | 150 g  | yeast cake with crumble                                                                          | 50 g   | pickled cucumber         | 70 g   |

**Table S2.** Nutritional values of diets used in the study [61].

|                      | High-fiber diet         | Basic diet              | Standard diet             |
|----------------------|-------------------------|-------------------------|---------------------------|
| <b>Protein</b>       | 151 g (19% of energy)   | 104 g (16.4% of energy) | 138.4 g (22.6% of energy) |
| <b>Fat</b>           | 120.3 g (24% of energy) | 101 g (35.6% of energy) | 114.4 g (42% of energy)   |
| <b>Carbohydrates</b> | 423.2 g (47% of energy) | 331 g (47.1% of energy) | 237.4 g (35.4% of energy) |
| <b>Fiber</b>         | 50.3 g                  | 27.8 g                  | 21.0 g                    |
| <b>Energy</b>        | 3186.6 kcal             | 2545 kcal               | 2451 kcal                 |

|                  |           |         |         |
|------------------|-----------|---------|---------|
| <b>Vitamin A</b> | 4.75 mg   | 2.83 mg | 0.47 mg |
| <b>Vitamin C</b> | 307.2 mg  | 76.6 mg | 50.7 mg |
| <b>Vitamin E</b> | 24.8 mg   | 15.7 mg | 14.3 mg |
| <b>Calcium</b>   | 1618.5 mg | 502 mg  | 1067 mg |
| <b>Sodium</b>    | 3410.8 mg | 2207 mg | 4053 mg |
| <b>Potassium</b> | 6924.8 mg | 4700 mg | 5156 mg |
| <b>Magnesium</b> | 689.3 mg  | 349 mg  | 497 mg  |
| <b>Iron</b>      | 21.4 mg   | 13.6 mg | 15 mg   |

The nutritional value of the diets was calculated using Dietetyk 2006 software (Jumar, Poland).
